# Supplementary material for: Characterization of pPCP1 Plasmids inYersinia pestisStrains Isolated from the Former Soviet Union
Source: Hindawi journal article supplement (doi:10.1155/2010/760819), 2010-01-01
Supplement: f1 [file 760819.f1.pdf]

511

512 **Table 1. Primers used for the PCR and qPCR studies and for sequencing the pPCP1**513 **plasmids (supplementary material)**

| Gene         | Primers 5' → 3'            | Reference          | Amplicon size (bp) |
|--------------|----------------------------|--------------------|--------------------|
| yp0120ms01 F | CTAAGCACAAATTGTTATGCTGAACC | Pourcel et al 2004 |                    |
| yp0120ms01 R | TACTGAATCTGCTTCATTGTTCAAA  |                    |                    |
| yp1290ms04 F | CGCTGTGAAGTTTTAGTGTAAGAA   | Pourcel et al 2004 |                    |
| yp1290ms04 R | AAATGTAACCTGCCAAACGTG      |                    |                    |
| yp2769ms06 F | AATTTTGCTCCCAAATAGCAT      | Pourcel et al 2004 |                    |
| yp2769ms06 R | TTTTCCCATTAGCGAAATAAGTA    |                    |                    |
| yp2916ms07 F | ATACCGCTACGATCAGCCTCTAT    | Pourcel et al 2004 |                    |
| yp2916ms07 R | ATTTAATATTGATTTTGGGACTTGC  |                    |                    |
| yp1335ms46 F | CAGGTTTTACGTTATTTCTGAAGG   | Pourcel et al 2004 |                    |
| yp1335ms46 R | CAGCATGAAGTATGACGGGTATATTA |                    |                    |
| yp4280ms62 F | TTTAGTCTTGATTAAGCTGCGTTTT  | Pourcel et al 2004 |                    |
| yp4280ms62 R | ACGGAAGACAACCTTATTATTGATG  |                    |                    |
| yp1580ms70 F | AAACCAACGGTTCATATTGAATAAA  | Pourcel et al 2004 |                    |
| yp1580ms70 R | CTTCTCCGCTATTTTCCTACAGA    |                    |                    |
| Pla F1       | AAG TTC TAT TGT GGC AAC C  | This study         | 470                |
| Pla R1       | CGTGTTCCTGATATCCTGCT       |                    |                    |
| Pst F        | GGTGTCCGGCTTTTCTCTT        | This study         | 201                |
| Pst R        | TTCCTGGCGGATCTTATTTG       |                    |                    |
| Pim F        | CATGGCATCTATGGGAAACA       | This study         | 197                |
| Pim R        | GCTACATATGTTGGCGGTCCT      |                    |                    |
| glnAF        | AAGCGGTTACTTCCCTGTT        | This study         | 156                |
| glnAR        | CGGGTAGCCACTTCGTTTT        |                    |                    |
| PlaF2        | TGTGAAAGGCTGGTACTCC        | This study         | 145                |
| PlaR2        | CCTATTACCCGCACTCCTTT       |                    |                    |
| pcp1F        | CGGTGCAATAGTGATCCACA       | This study         | 660                |
| pcp1R        | CACGTTGCAGAACCACAGTT       |                    |                    |
| pcp2F        | GGAGACCTGCCATCGTAATG       | This study         | 673                |
| pcp2R        | GAAGCAGATGCTCCAGGAAG       |                    |                    |
| pcp3F        | GTTGCAACTGGAAAGCCTTA       | This study         | 663                |
| pcp3R        | TGAACGACATGTGAGTGGTG       |                    |                    |
| pcp4F        | GGTATGCAGCACTGACCT         | This study         | 654                |
| pcp4R        | TCTGACGACATGAAACGAAAA      |                    |                    |
| pcp5F        | GTAACGCGATTTCCGTACC        | This study         | 670                |
| pcp5R        | GCATCCAGAGCATCCAGTTT       |                    |                    |
| pcp6F        | ATGGCGGATTTATCAGAAG        | This study         | 659                |
| pcp6R        | TTAAGTCCTGTCGGGTTTCG       |                    |                    |

|        |                           |            |     |
|--------|---------------------------|------------|-----|
| pcp7F  | CCTGACGAGCATCACAAAAA      | This study | 650 |
| pcp7R  | GTGTTACCGCAGCAATACCC      |            |     |
| pcp8F  | CCGATCAGTTCAGCAGAAGA      | This study | 650 |
| pcp8R  | TGAGGGGCTTGCTATTAATGAT    |            |     |
| pcp9F  | AAAGAAATCTATCCCTGGTTGC    | This study | 649 |
| pcp9F  | GTTGACCACGATATTTCTCCA     |            |     |
| pcp10F | CGGATTAACCCTTCAAAACC      | This study | 655 |
| pcp10F | CAGAGAAAATAAAGCGGCGTA     |            |     |
| pcp11F | CCATTGTATCTGACATAAAAAATCC | This study | 689 |
| pcp11F | CGTTTTCTCGTCGTCTGACA      |            |     |
| pcp12F | CCTGGATATTTCCACCGTTT      | This study | 670 |
| pcp12F | GAACCACCTGTAGCTGTCCAA     |            |     |
| pcp13F | GGCTGGTTACTCCAGGATGA      | This study | 686 |
| pcp13F | TGGAGAATGTCAAGGCAAAA      |            |     |
| pcp14F | TGACCAACCTTCAGATGTGTG     | This study | 698 |
| pcp14F | CAGGAAAAGGTTTTGGCTGA      |            |     |
| pcp15F | GCATATGGCCTGGGTAACTC      | This study | 696 |
| pcp15F | GGGAGCGTTTTAAGCAGGTT      |            |     |
| pcp16F | CATGCGTATCCAGGATGAGT      | This study | 770 |
| pcp16F | GCAGATTACCCCTGGATCT       |            |     |

514  
515

516  
517  
518  
519  
520  
521

**Table 2. Tandem repeat numbers for 7 loci used in this study (supplementary material)**

| Strains | ms01 | ms04 | ms06 | ms07 | ms46 | ms62 | ms70 |
|---------|------|------|------|------|------|------|------|
| 1390G   | 7.1  | 4.8  | 7.6  | 8.3  | 6.0  | 11.3 | 2.7  |
| 1391G   | 7.1  | 4.8  | 7.6  | 8.3  | 6.0  | 11.3 | 2.6  |
| 1392G   | 7.1  | 4.8  | 7.6  | 8.3  | 6.0  | 11.3 | 2.7  |
| 1393G   | 7.1  | 4.8  | 7.6  | 8.3  | 6.0  | 11.3 | 2.7  |
| 1412G   | 7.6  | 4.8  | 7.4  | 8.3  | 6.0  | 11.3 | 2.1  |
| 1413G   | 7.3  | 4.8  | 7.6  | 8.3  | 6.0  | 11.3 | 2.6  |
| 1670G   | 7.3  | 4.8  | 7.6  | 8.3  | 6.0  | 11.3 | 2.6  |
| 1851G   | 7.1  | 4.8  | 7.6  | 8.3  | 6.0  | 11.3 | 2.7  |
| 1852G   | 7.1  | 4.8  | 7.5  | 8.2  | 6.0  | 11.3 | 2.6  |
| 1853G   | 7.3  | 4.8  | 7.6  | 8.3  | 6.0  | 11.3 | 3.5  |
| 1952G   | 7.1  | 4.8  | 6.7  | 8.3  | 6.0  | 11.3 | 2.6  |
| 1953G   | 7.1  | 4.8  | 7.6  | 8.3  | 6.0  | 11.3 | 2.7  |
| 1954G   | 7.1  | 4.8  | 7.3  | 8.3  | 6.0  | 11.3 | 2.7  |
| 2095G   | 7.1  | 4.8  | 7.6  | 8.3  | 6.0  | 11.3 | 2.7  |
| 3064G   | 7.1  | 4.8  | 7.6  | 8.3  | 6.0  | 11.3 | 2.7  |
| 3065G   | 7.1  | 4.8  | 7.3  | 8.3  | 6.0  | 11.3 | 2.7  |
| 3066G   | 7.1  | 4.8  | 7.6  | 8.3  | 6.0  | 11.3 | 2.6  |
| 3067G   | 7.1  | 4.8  | 7.6  | 8.3  | 6.0  | 11.3 | 2.1  |
| 3072G   | 7.3  | 4.8  | 7.6  | 8.3  | 6.0  | 11.3 | 2.6  |
| 3073G   | 7.1  | 4.8  | 7.6  | 8.3  | 6.0  | 11.3 | 2.7  |
| 3082G   | 7.1  | 4.8  | 7.6  | 8.3  | 6.0  | 11.3 | 2.7  |
| 3083G   | 7.1  | 4.8  | 7.6  | 8.3  | 6.0  | 11.3 | 2.6  |
| 3757G   | 7.1  | 4.8  | 7.6  | 8.2  | 6.0  | 9.3  | 2.7  |
| 3758G   | 7.1  | 4.8  | 7.3  | 8.3  | 6.0  | 11.3 | 2.1  |
| 3768G   | 7.1  | 4.8  | 7.6  | 8.3  | 6.0  | 11.3 | 2.7  |
| 3769G   | 7.1  | 4.8  | 7.6  | 8.3  | 6.0  | 11.3 | 2.6  |
| 3770G   | 7.1  | 4.8  | 7.6  | 8.3  | 6.0  | 11.3 | 2.3  |
| 8786G   | 7.1  | 4.8  | 7.6  | 6.4  | 6.0  | 11.3 | 2.6  |
| 8787G   | 7.1  | 4.8  | 7.6  | 7.4  | 6.0  | 11.3 | 2.7  |
| 8788G   | 7.1  | 4.8  | 7.6  | 8.3  | 6.0  | 11.3 | 3.0  |
| 8789G   | 7.3  | 4.8  | 7.6  | 7.4  | 6.0  | 11.3 | 2.7  |
| 8790G   | 7.1  | 4.8  | 7.6  | 8.3  | 6.0  | 11.3 | 2.7  |
| 8791G   | 7.1  | 4.8  | 7.6  | 8.3  | 6.0  | 11.3 | 2.7  |
| 8792G   | 7.1  | 4.8  | 7.6  | 8.3  | 6.0  | 11.3 | 2.1  |
| 8793G   | 7.2  | 4.8  | 7.6  | 8.3  | 6.0  | 11.3 | 2.6  |
| 8794G   | 7.1  | 4.8  | 7.5  | 8.3  | 6.0  | 11.3 | 2.7  |
| 8906G   | 7.1  | 4.8  | 7.6  | 8.3  | 6.0  | 11.3 | 2.6  |
| 8907G   | 7.3  | 4.8  | 6.6  | 8.3  | 6.0  | 11.3 | 2.6  |
| 8908G   | 7.1  | 4.8  | 7.6  | 8.3  | 6.0  | 11.3 | 2.7  |
| C1045   | 7.1  | 5.5  | 3.5  | 7.4  | 0.0  | 13.3 | 4.7  |
| C14735  | 7.3  | 4.8  | 7.5  | 9.4  | 6.0  | 10.3 | 2.7  |
| C1522   | 7.3  | 4.8  | 7.5  | 9.4  | 6.0  | 10.3 | 7.6  |
| C2614   | 7.1  | 5.8  | 3.5  | 8.3  | 0.0  | 17.3 | 7.7  |
| C2944   | 7.1  | 5.8  | 3.5  | 8.3  | 0.0  | 17.3 | 6.6  |
| C771    | 7.1  | 5.8  | 3.5  | 8.2  | 3.4  | 13.3 | 6.7  |
| C790    | 6.1  | 6.8  | 7.5  | 7.4  | 0.0  | 7.3  | 2.1  |
| CO92    | 8.3  | 7.8  | 8.5  | 9.3  | 7.0  | 6.3  | 5.7  |
| KIM     | 6.1  | 5.8  | 3.5  | 6.4  | 0.0  | 10.3 | 5.7  |
